# Supplementary material for: Rationally constructing hollow N-doped carbon supported Ru catalysts for enhanced hydrogenation catalysis
Source: Royal Society of Chemistry journal article supplement (doi:10.1039/d4nj00199k), 2024-01-01
Supplement: d4nj00199k1.pdf [file d4nj00199k1.pdf]

## **Rationally constructing hollow N-doped carbon supported Ru catalyst for enhanced hydrogenation catalysis**

Tiantian Liu<sup>†</sup>, Jing Li<sup>†</sup>, Xiaorui Yan, Kairui Li, Wenhua Wang, Haisheng Wei\*

School of chemistry & chemical engineering, Yantai University, Yantai 264005,  
Shandong, China

Corresponding author: haishengwei@ytu.edu.cn

<sup>†</sup> These authors contributed equally to this work.

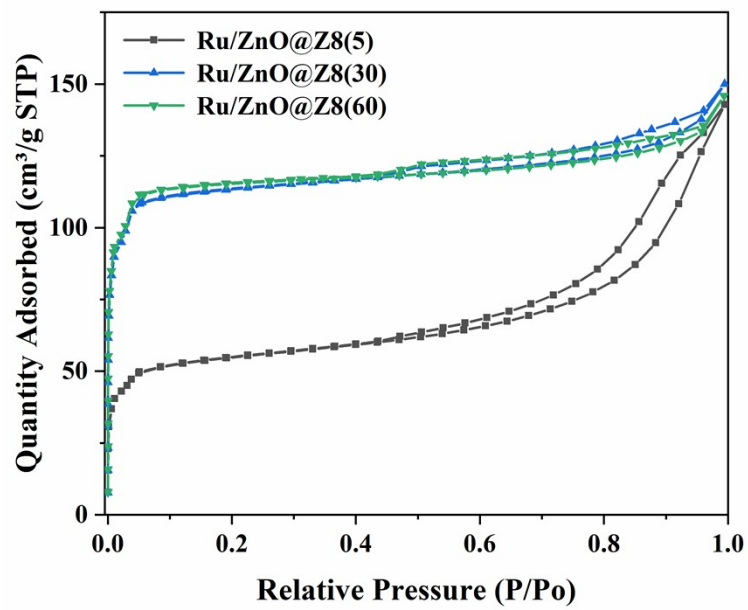

Figure S1 N<sub>2</sub> adsorption-desorption isotherms of Ru/ZnO@Z8(x) catalysts.

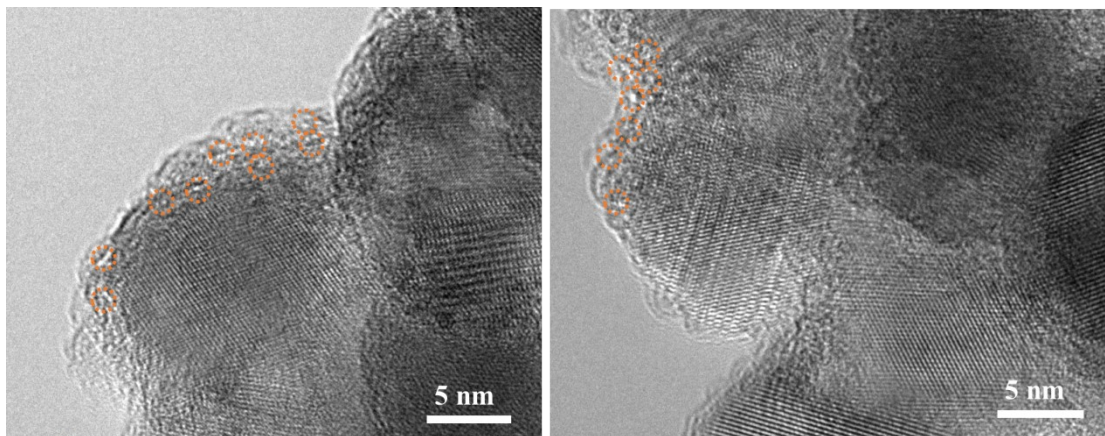

Figure S2 Representative HRTEM images of Ru/ZnO@Z8(5)-C catalyst. The circles indicate there are many white spots or even belts in the overlayer, suggesting the presence of porous structure.

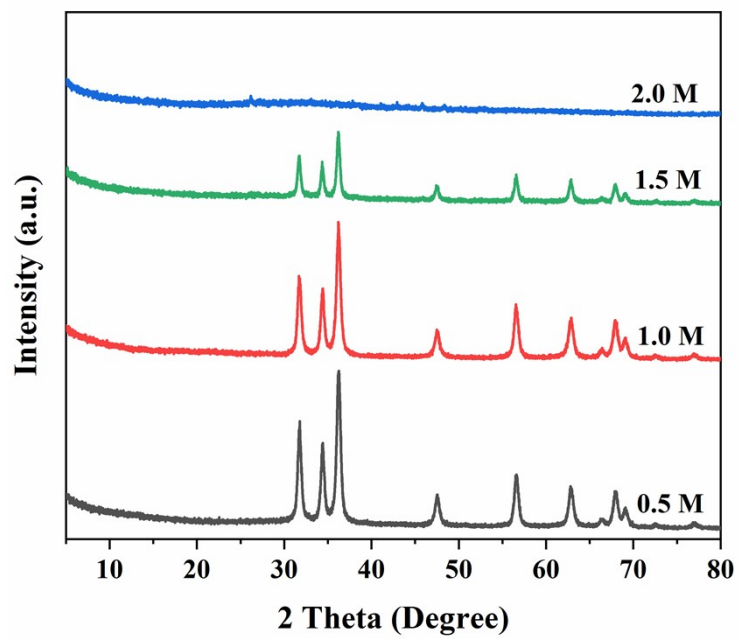

Figure S3 XRD patterns of Ru/ZnO@Z8(5)-C catalyst treated by NaOH solution with different concentration.

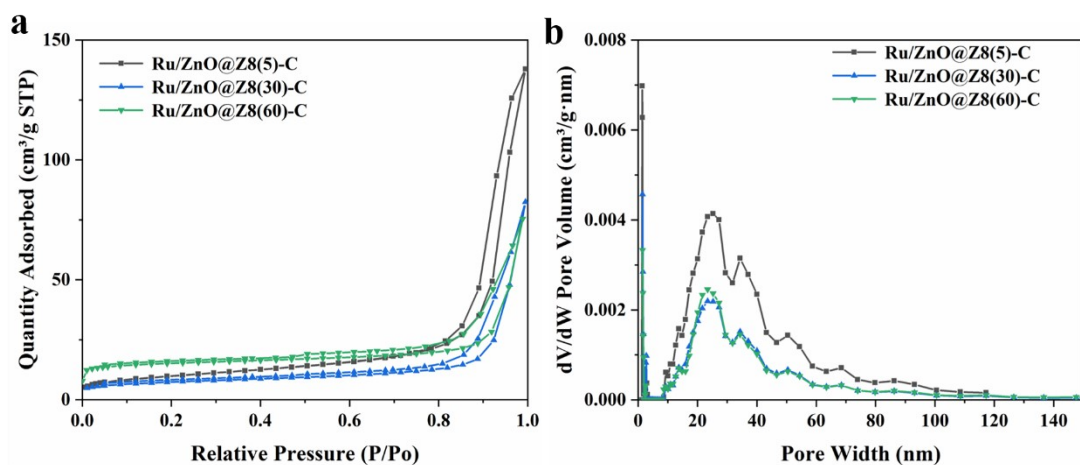

Figure S4 N<sub>2</sub> adsorption-desorption isotherms of Ru/ZnO@Z8(x)-C catalysts (a), the corresponding pore size distribution (b).

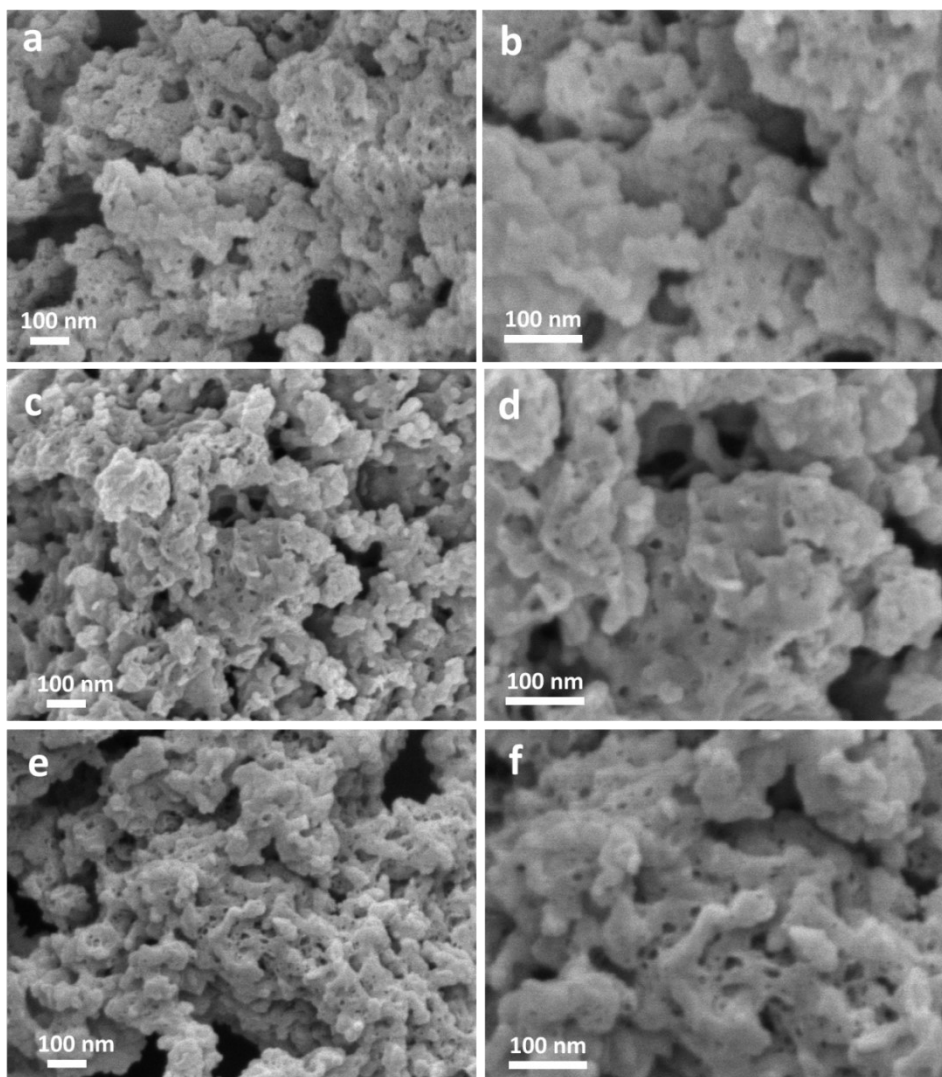

Figure S5 SEM images of Ru/H(5)-NC (a, b), Ru/H(30)-NC (c, d), Ru/H(60)-NC (e, f) catalysts.

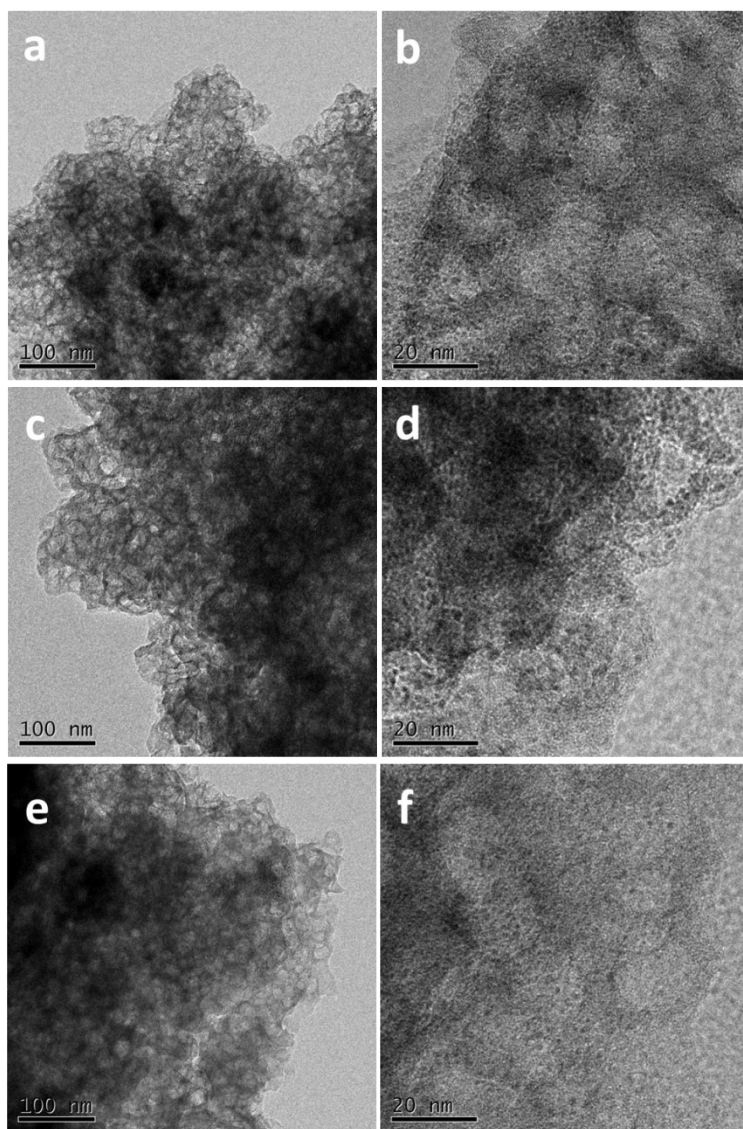

Figure S6 HRTEM images of Ru/H(5)-NC (a, b), Ru/H(30)-NC (c, d) and Ru/H(60)-NC (e, f) catalysts.

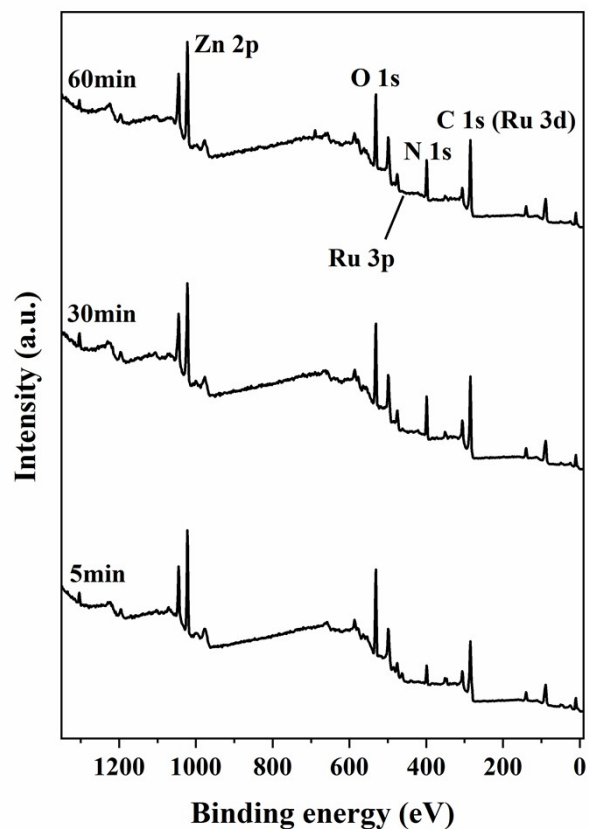

Figure S7 The full spectra of Ru/H(x)-NC catalysts by XPS analysis.



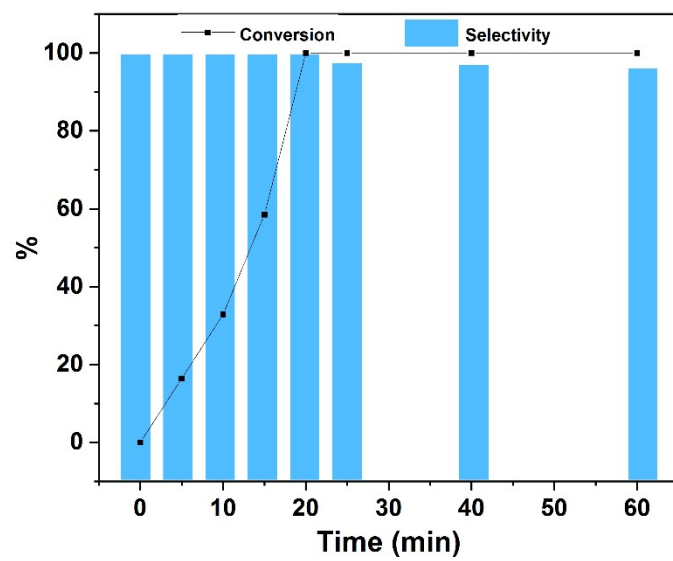

Figure S8 Conversion (Selectivity)-time diagram of Ru/H(5)-NC catalyst.

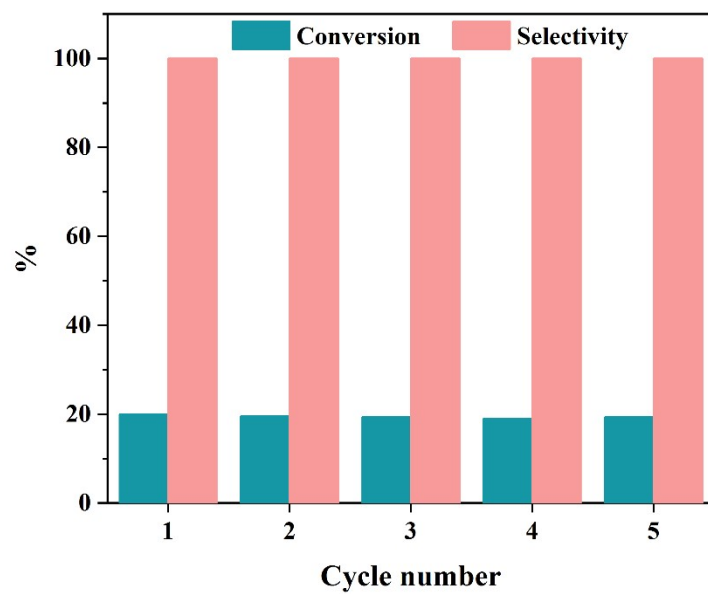

Figure S9 Stability test with Ru/H(5)-NC catalyst under low conversion.

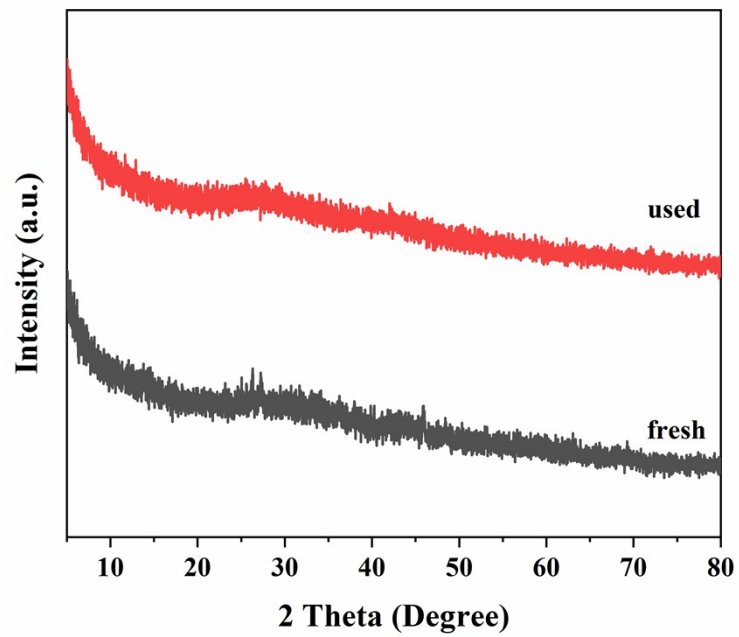

Figure S10 XRD patterns of Ru/H(5)-NC catalyst before and after hydrogenation reaction.

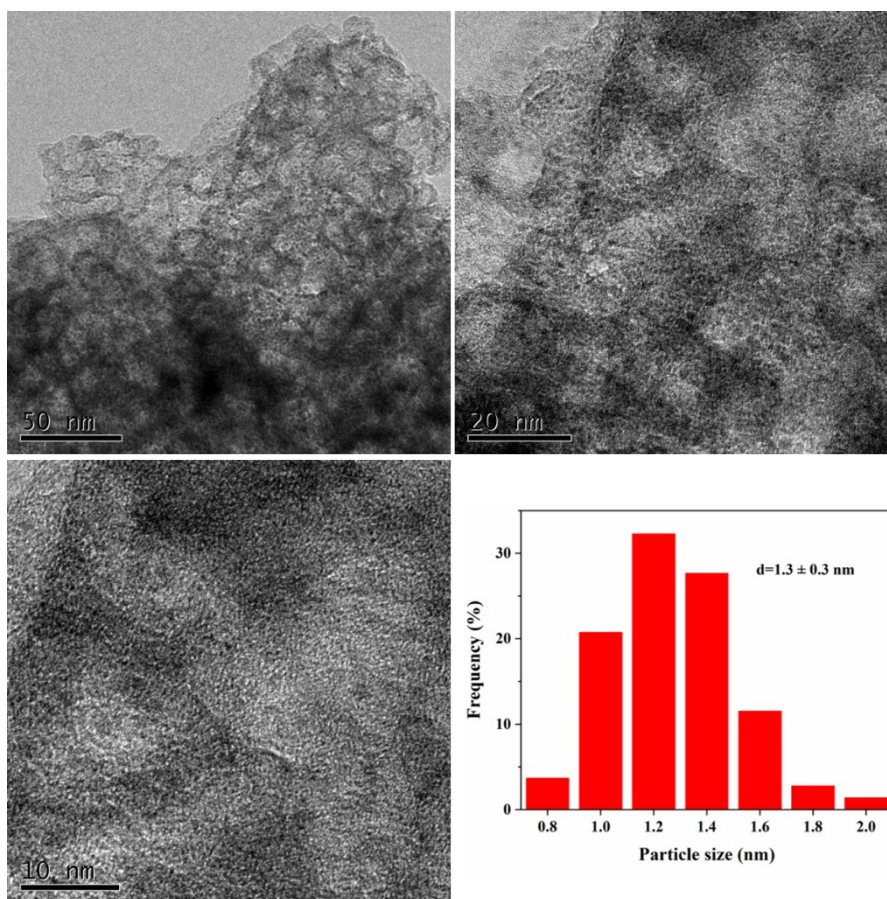

Figure S11 HRTEM images of Ru/H(5)-NC catalyst after cyclic experiments.

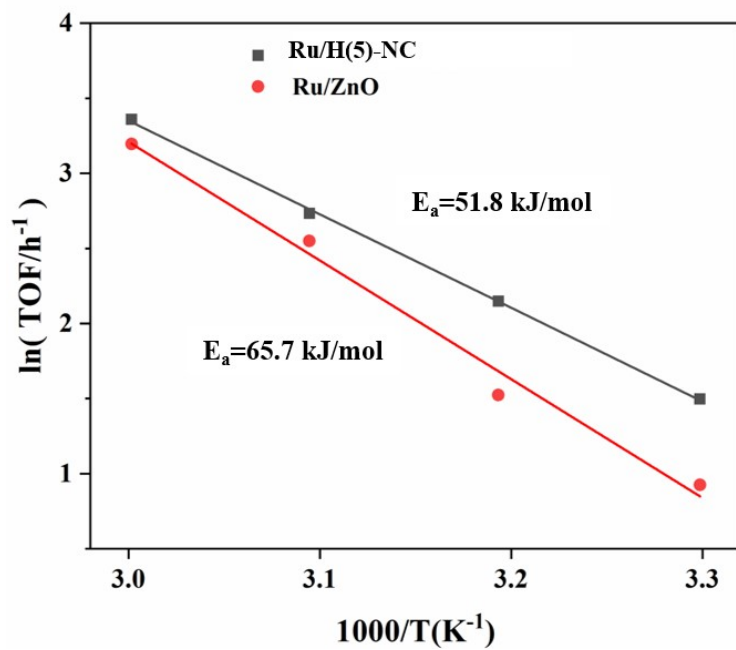

Figure S12 Activation energy tests for Ru/H(5)-NC and Ru/ZnO catalysts.

Table S1 The BET surface area and pore volume results for different catalysts.

| Catalyst        | BET Surface Area(m <sup>2</sup> /g) | Pore Volume (cm <sup>3</sup> /g) |
|-----------------|-------------------------------------|----------------------------------|
| Ru/ZnO@Z8(5)    | 173                                 | 0.19                             |
| Ru/ZnO@Z8(30)   | 347                                 | 0.21                             |
| Ru/ZnO@Z8(60)   | 349                                 | 0.20                             |
| Ru/ZnO@Z8(5)-C  | 30                                  | 0.082                            |
| Ru/ZnO@Z8(30)-C | 17                                  | 0.043                            |
| Ru/ZnO@Z8(60)-C | 14                                  | 0.039                            |
| Ru/H(5)-NC      | 271                                 | 0.60                             |
| Ru/H(30)-NC     | 216                                 | 0.51                             |
| Ru/H(60)-NC     | 197                                 | 0.45                             |

Table S2 TEM and XRD analyses of the cavity size in Ru/H(x)-NC catalyst

| Catalyst    | $d_1^a$ (nm)   | $d_2^b$ (nm) |
|-------------|----------------|--------------|
| Ru/H(5)-NC  | $17.4 \pm 2.0$ | 17.8         |
| Ru/H(30)-NC | $16.1 \pm 2.0$ | 16.3         |
| Ru/H(60)-NC | $15.4 \pm 1.9$ | 15.7         |

<sup>a</sup> The cavity size of the catalyst obtained by TEM characterization was calculated by measuring 200 hollow structure, <sup>b</sup> the particle size of the etched residual ZnO was obtained from XRD data by Scherrer's formula.

Table S3 The effect of solvent for the hydrogenation reaction with Ru/H(5)-NC catalyst.

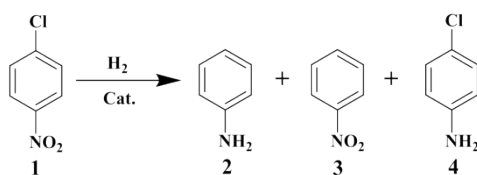

| Solvent         | Conv. (%) | Sel. (%) |   |      |
|-----------------|-----------|----------|---|------|
|                 |           | 2        | 3 | 4    |
| toluene         | 98.7      | 0        | 0 | >99  |
| ethanol         | 97.2      | 8.7      | 0 | 91.3 |
| methanol        | 98.2      | 6.3      | 0 | 93.7 |
| tetrahydrofuran | 31.3      | 0        | 0 | >99  |
| isopropanol     | 40.6      | 0        | 0 | >99  |

Reaction condition: 50 °C, 0.5 MPa H<sub>2</sub>, 0.5 mmol p-chloronitrobenzene, 0.25 mmol 1,3,5-trimethylbenzene (internal standard), 5 mL solvent, 19 min.



Table S4 The effect of temperature for the hydrogenation reaction with Ru/H(5)-NC catalyst.

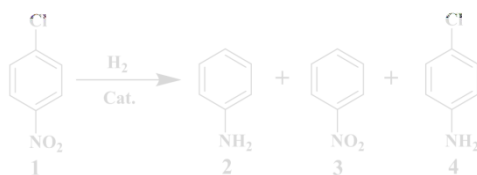

| T<br>(°C)       | Conv.<br>(%) | Sel. (%) |   |      |
|-----------------|--------------|----------|---|------|
|                 |              | 2        | 3 | 4    |
| 30              | 72.8         | 0        | 0 | >99  |
| 40              | 85.2         | 0        | 0 | >99  |
| 50              | 98.2         | 0        | 0 | >99  |
| 60 <sup>a</sup> | 98.5         | 5.3      | 0 | 94.7 |

Reaction condition: 0.5 MPa H<sub>2</sub>, 0.5 mmol p-chloronitrobenzene, 0.25 mmol 1,3,5-trimethylbenzene (internal standard), 5 mL toluene, 19 min. <sup>a</sup> 15 min.

Table S5 The effect of pressure for the hydrogenation reaction with Ru/H(5)-NC catalyst.



| P<br>(MPa)     | Conv.<br>(%) | Sel. (%) |   |     |
|----------------|--------------|----------|---|-----|
|                |              | 2        | 3 | 4   |
| 0.3            | 83.8         | 0        | 0 | >99 |
| 0.5            | 98.2         | 0        | 0 | >99 |
| 0.7            | 100          | 0        | 0 | >99 |
| 1 <sup>a</sup> | 100          | 0        | 0 | >99 |

Reaction condition: 50 °C, 0.5 mmol p-chloronitrobenzene, 0.25 mmol 1,3,5-trimethylbenzene (internal standard), 5 mL toluene, 19 min. <sup>a</sup> 15 min.
